# Supplementary material
Source: PubMed Central journal article supplement (PMC6754278)

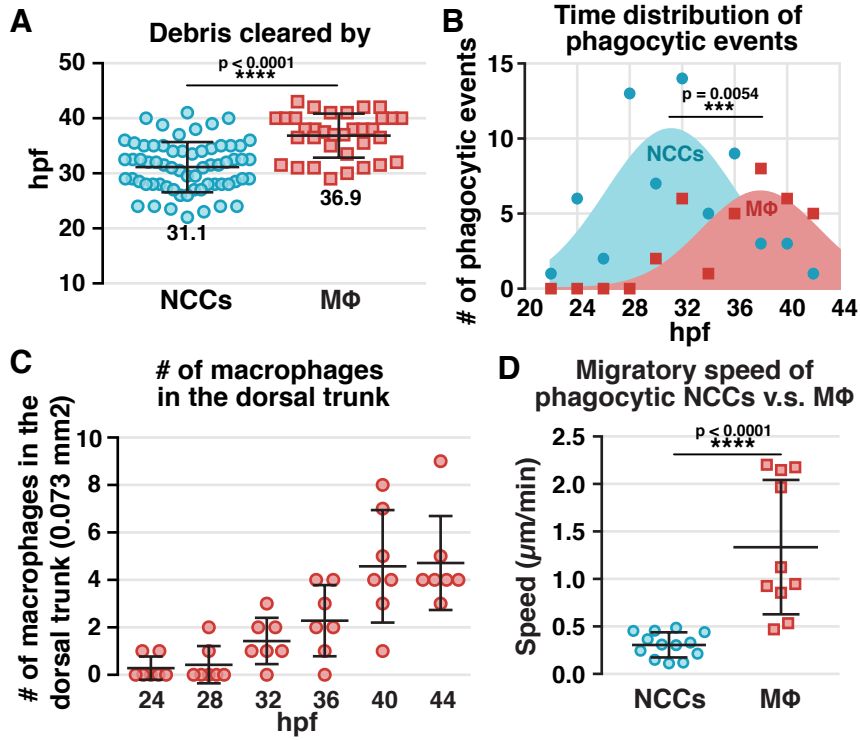

Supplement: NIHMS1536870-supplement-11.pdf [file NIHMS1536870-supplement-11.pdf]
